# Supplementary material for: Loss of Renal Tubular PGC-1α Exacerbates Diet-Induced Renal Steatosis and Age-Related Urinary Sodium Excretion in Mice
Source: PubMed Central journal article supplement (PMC4963111; doi:10.1371/journal.pone.0158716), 2016-07-27

**A**

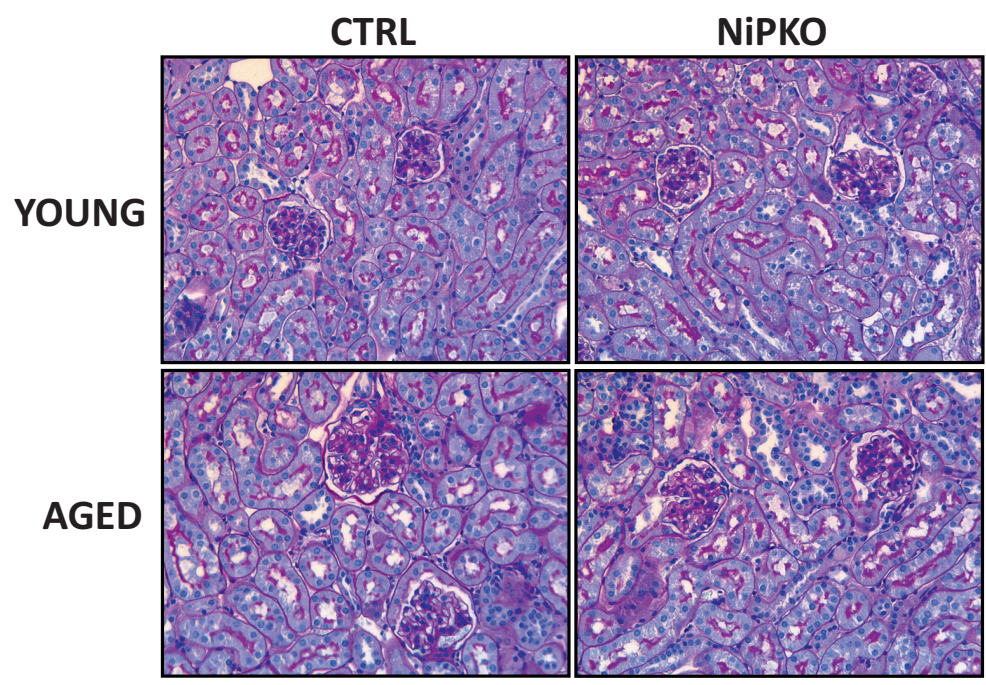

**B**

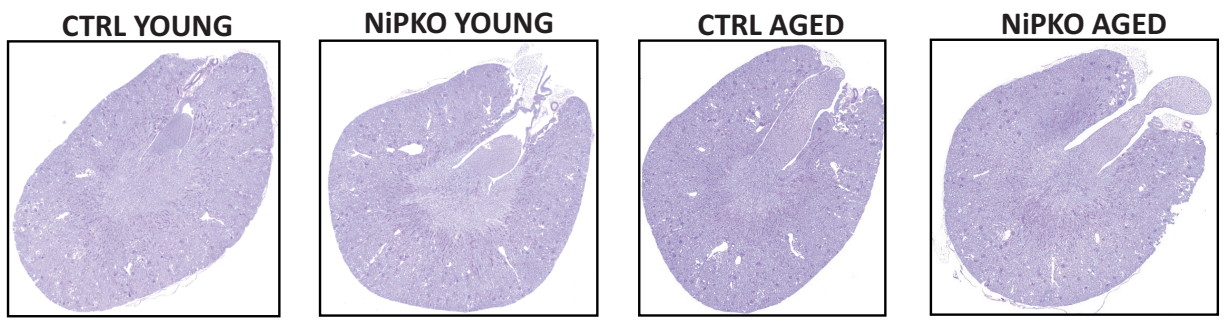

Supplement: pone.0158716.s001.pdf [file pone.0158716.s001.pdf]
