# Supplementary material for: Loss of Renal Tubular PGC-1α Exacerbates Diet-Induced Renal Steatosis and Age-Related Urinary Sodium Excretion in Mice
Source: PubMed Central journal article supplement (PMC4963111; doi:10.1371/journal.pone.0158716), 2016-07-27
Supplement: pone.0158716.s007.pdf [file pone.0158716.s007.pdf]

**S1 Table**

| <b>Target gene</b>                   | <b>Forward primer</b>    | <b>Reverse primer</b>                                 |
|--------------------------------------|--------------------------|-------------------------------------------------------|
| <b>Acadl</b>                         | CCAGCTAATGCCTTACTTGGAGA  | GCAATTAAGAGCCTTTCCTGTGG                               |
| <b>Acadvl</b>                        | GTAGCCTCCATCCGAAGCTC     | CAGGCCCCCATTACTGATCC                                  |
| <b>Acot2</b>                         | AGTGCCTATGAAGGACTGAGG    | TCTTACGGCACTGGGAATG                                   |
| <b>Acot3</b>                         | AGCTCTTGACCTGTCTGTCTG    | GAGAAAGTTCAAGCAAAGTGGG                                |
| <b>Atp5h</b>                         | GGGGGTCGGTGAAGTATCC      | AATTGCCTTCTGGTTTTGGGG                                 |
| <b>Atp5k</b>                         | GCCAAGCGCTACAGTTACCTA    | GCCAGTTCTCTCTCAATCCGT                                 |
| <b>Cox5a</b>                         | CCTGGGAATTGCGTAAAGGGA    | TAACCGTCTACATGCTCGCAA                                 |
| <b>Cs</b>                            | CCCAGGATACGGTCATGCA      | GCAAAGTCTCGCTGACAGGAA<br>GATTAGACCCGTTACCATCGAGA<br>T |
| <b>D-loop (mtDNA)</b>                | GGTTCTTACTTCAGGGCCATCA   | CTGGCCGCCGGTGT                                        |
| <b>eEF2</b>                          | ATACCTGCCTGTCAATGAGTCCTT | ACCCTTGGGCTTAGGGTAGA                                  |
| <b>ENaC<math>\alpha</math></b>       | TGTGCATTCACTCCTGCTTC     | AGAGGTCAACCAATGCCAAC                                  |
| <b>ENaC<math>\beta</math></b>        | TGTTGATAGCCACTTTCC       | AAGGCAGATCTGGAGGGAAT                                  |
| <b>ENaC<math>\gamma</math></b>       | TTACAGCCAGTGCACAGAGG     | CTCCCCTGGATGGTCTCTT                                   |
| <b>Err<math>\alpha</math></b>        | CGGTGTGGCATCCTGTGA       | GGCTGCCATTATCAGGGTTG                                  |
| <b>Nbc</b>                           | GAAATCCAACCTTCGGTCCCT    | GACTTGACCTTGCCATTGGT                                  |
| <b>Ncct</b>                          | TGCTGACTTGGCTCATCATC     | CGTCTATCGCGTTCATCAGA                                  |
| <b>Ndufa1</b>                        | TCCACTGCGTACATCCACAAA    | AACTTGCAGGAAATCTTGTGCC                                |
| <b>Ndufs3</b>                        | AAAGACTTTCCCCTCACTGGC    | CCAAAACCCAGTGATCCAGC                                  |
| <b>Ndufv1</b>                        | CTTCCCCACTGGCCTCAAG      | GGGGGTAATCCAGGGTGAAC                                  |
| <b>Nhe2</b>                          | CAAGTCCTGCCAGTGTGGTG     | TGTGGGACAGGTGAAAGACG                                  |
| <b>Nhe3</b>                          | CACCTTCAAATGGCACCACG     | ACTGGAAGGCTCAACACGAT                                  |
| <b>Nkcc2</b>                         | TGGAAGCAGTCAAGGAAAAG     | GCTGCATGGTTCTGAGTGCTAAG                               |
| <b>PGC-1<math>\alpha</math></b>      | AGCCGTGACCACTGACAACGAG   | GACGACTGACAGCACTTGGA                                  |
| <b>PGC-1<math>\beta</math></b>       | CCATGCTGTTGATGTTCCAC     | GCCGAAAGAAGCCCTTACAG                                  |
| <b>PPAR<math>\alpha</math></b>       | ACAAGGCCTCAGGGTACCA      | CCAGCGCATTGAACTTGACA                                  |
| <b>PPAR<math>\beta/\delta</math></b> | GCAAGCCCTTCAGTGACATCA    | AATGCGAGTGGTCTTCCATCA                                 |
| <b>PPAR<math>\gamma</math></b>       | CCCACCAACTTCGGAATCAG     | CGCATTGACTGCTGCTTGTC                                  |
| <b>PRC</b>                           | CACCCTGCCGGAGTGAAAT      | GAACAGAGAGGCTCCAACCG                                  |
| <b>SglT2</b>                         | TTGGTGTGGCTTGTGGTCT      | CAGACCAAACCCAAAGAAGCA                                 |
| <b>Slc25a20</b>                      | CTGCGCCCATCATTGGA        | GGAGATGGACGGAGTATAGCG                                 |
| <b>Slc38a2</b>                       | GCAGTGGAAATCCTTGGGCTT    | TCGGGGTACAAGGAGAGCTT                                  |
| <b>Slc38a3</b>                       | GTACGGCCGGGGGATATAGA     | CCTGAATACTGTCCCCGCTG                                  |
| <b>Slc38a4</b>                       | AGACAGAAAGGCGGGAAAGG     | AATGGGGGTGTGACTTCAGC                                  |
| <b>Slc7a7</b>                        | AGGCTGTAAAGAGGCGGAAC     | CTGGCTTGTGTGGGAAAGAT                                  |
| <b>Tbp</b>                           | TGCTGTTGGTGATTGTTGGT     | TAAGTGGGACACTTCGACTGC                                 |
| <b>Uqrf1</b>                         | CCTGAAGGGAAGAATGCT       | CCTGTGCTTAGTATGGCTCC                                  |
| <b>Ylat2</b>                         | GACGGCGGACCGAG           |                                                       |
