# Supplementary material for: Loss of Renal Tubular PGC-1α Exacerbates Diet-Induced Renal Steatosis and Age-Related Urinary Sodium Excretion in Mice
Source: PubMed Central journal article supplement (PMC4963111; doi:10.1371/journal.pone.0158716), 2016-07-27
Supplement: pone.0158716.s008.pdf [file pone.0158716.s008.pdf]

S2 Table

| Groups                                   | Number of genes | Genes                                                                                                                                                                                                                                                                                                                                                                                                   |                                                                                                                                                                                                                                                                                                                     |                                                                                                                                                                                                                                                                                                                                                   |                                                                                                                                                                                                                                                                                                                                                  |
|------------------------------------------|-----------------|---------------------------------------------------------------------------------------------------------------------------------------------------------------------------------------------------------------------------------------------------------------------------------------------------------------------------------------------------------------------------------------------------------|---------------------------------------------------------------------------------------------------------------------------------------------------------------------------------------------------------------------------------------------------------------------------------------------------------------------|---------------------------------------------------------------------------------------------------------------------------------------------------------------------------------------------------------------------------------------------------------------------------------------------------------------------------------------------------|--------------------------------------------------------------------------------------------------------------------------------------------------------------------------------------------------------------------------------------------------------------------------------------------------------------------------------------------------|
| CKOxHKO<br>CWTxCKO<br>CWTxHWT<br>HWTxHKO | 3               | Acot11<br>Dhcr7<br>Tiam2                                                                                                                                                                                                                                                                                                                                                                                |                                                                                                                                                                                                                                                                                                                     |                                                                                                                                                                                                                                                                                                                                                   |                                                                                                                                                                                                                                                                                                                                                  |
| CWTxCKO<br>CWTxHWT<br>HWTxHKO            | 4               | LOC100862384<br>LOC100862317<br>Ndrgr2<br>Oxct1                                                                                                                                                                                                                                                                                                                                                         |                                                                                                                                                                                                                                                                                                                     |                                                                                                                                                                                                                                                                                                                                                   |                                                                                                                                                                                                                                                                                                                                                  |
| CKOxHKO<br>CWTxCKO<br>HWTxHKO            | 1               | 2610029I01Rik                                                                                                                                                                                                                                                                                                                                                                                           |                                                                                                                                                                                                                                                                                                                     |                                                                                                                                                                                                                                                                                                                                                   |                                                                                                                                                                                                                                                                                                                                                  |
| CKOxHKO<br>CWTxCKO<br>CWTxHWT            | 2               | 4732415M23Rik<br>Aldh1l1                                                                                                                                                                                                                                                                                                                                                                                |                                                                                                                                                                                                                                                                                                                     |                                                                                                                                                                                                                                                                                                                                                   |                                                                                                                                                                                                                                                                                                                                                  |
| CWTxCKO<br>HWTxHKO                       | 147             | 1110001J03Rik<br>1700028J19Rik<br>1700040L02Rik<br>1810014F10Rik<br>2010107E04Rik<br>2310061C15Rik<br>2410003L11Rik<br>4930452B06Rik<br>4930481A15Rik<br>Acsl3<br>Adcy1<br>Afg3l2<br>Agl<br>Agt<br>Ak1<br>Ak3<br>Akr1b10<br>Apoo<br>Arhgap6<br>Aspdh<br>Aste1<br>Atp5e<br>Atp5f1<br>Atp5g3<br>Atp5h<br>Atp5sl<br>Baiap2l2<br>BC090627<br>Bola3<br>C030037D09Rik<br>Cadm4<br>Ccadc68<br>Chchd10<br>Ckmt1 | Coq9<br>Cox10<br>Cox5a<br>Cox7a1<br>Cox7a2<br>Cyc1<br>Cyca<br>Cyp2d22<br>Cyp2u1<br>Dlat<br>Dlst<br>Dpp4<br>Enpp6<br>Epb4.9<br>Etfdh<br>Faah<br>Fastk<br>Fastkd1<br>Fbxo18<br>Fbxo44<br>Fh1<br>Gfm1<br>Glod5<br>Glrx<br>Gm10767<br>Gm16845<br>Gm19447<br>Gm20141<br>Gm2695<br>Gm53<br>Gm906<br>Gnb5<br>Got1<br>Gsto1 | Impa2<br>Kcna4<br>Khdrbs3<br>Klk1b5<br>Klk1b7-ps<br>Ldhd<br>LOC100046079<br>LOC100862063<br>Luzp1<br>Lynx1<br>Lym5<br>Mdh2<br>Mir196a-1<br>Mrpl13<br>Mrps35<br>Msrb2<br>Mtfp1<br>Ndufa1<br>Ndufa12<br>Ndufa4<br>Ndufa8<br>Ndufa9<br>Ndufaf4<br>Ndufc1<br>Ndufs3<br>Ndufs8<br>Nol3<br>Nr0b2<br>Nudt7<br>Oplah<br>Oxnad1<br>Pcolce<br>Pfkml<br>Pfkp | Pla2g7<br>Pon3<br>Ppif<br>Ptges2<br>Ptpn18<br>Rtn4ip1<br>Sirt3<br>Slc12a7<br>Slc16a5<br>Slc25a12<br>Slc25a4<br>Slc2a4<br>Slc6a8<br>Srxn1<br>Stard8<br>Suv420h2<br>Sv2a<br>Tarm1<br>Thap4<br>Tmem35<br>Tmem38a<br>Tom1l1<br>Trmt2b<br>Trp53inp2<br>Tspo<br>Ubac1<br>Uqcr10<br>Uqcrb<br>Uqcrc1<br>Uqcrfs1<br>Uqcrh<br>Uqcrq<br>Vmn1r157<br>Zdhhc23 |

|                            |            |                                                                                                                                                                                                                                                                                                                       |                                                                                                                                                                                                                                                           |                                                                                                                                                                                                                                                   |                                                                                                                                                                                                                                                                     |
|----------------------------|------------|-----------------------------------------------------------------------------------------------------------------------------------------------------------------------------------------------------------------------------------------------------------------------------------------------------------------------|-----------------------------------------------------------------------------------------------------------------------------------------------------------------------------------------------------------------------------------------------------------|---------------------------------------------------------------------------------------------------------------------------------------------------------------------------------------------------------------------------------------------------|---------------------------------------------------------------------------------------------------------------------------------------------------------------------------------------------------------------------------------------------------------------------|
|                            |            | Clybl<br>Cntnap5b<br>Comtd1                                                                                                                                                                                                                                                                                           | Gys1<br>Hsd12<br>ldh3a                                                                                                                                                                                                                                    | Pgam1<br>Pgk1<br>Pigy                                                                                                                                                                                                                             | Zfp30<br>Zfp691                                                                                                                                                                                                                                                     |
| <b>CWTxCKO<br/>CWTxHWT</b> | <b>48</b>  | 1110058L19Rik<br>1700040F15Rik<br>4933409K07Rik<br>4933413C19Rik<br>A230107N01Rik<br>Acot9<br>Al854703<br>Aqp3<br>Arhgef19<br>Cd93<br>Chka<br>Cyp26b1                                                                                                                                                                 | Cyp2c29<br>Cyp2c40<br>Echs1<br>Ehd1<br>Ftl1<br>Gbp11<br>Gm17361<br>Gm20066<br>Gm20251<br>Gm2427<br>Gm5039<br>Gm5347                                                                                                                                       | Gm7429<br>Gpx6<br>Hist1h4i<br>Hspa8<br>lpp<br>Klh3<br>Klrd1<br>LOC100861804<br>LOC100861972<br>Mir140<br>Mir151<br>Mmp13                                                                                                                          | Mup-ps12<br>Olfr490<br>Olfr851<br>Omd<br>Pm20d2<br>Prl2c5<br>Slc25a19<br>Smcr7<br>Spr<br>Tbc1d24<br>Tgoln1<br>Tmem136                                                                                                                                               |
| <b>CKOxHKO<br/>HWTxHKO</b> | <b>42</b>  | 1700042G15Rik<br>2610042L04Rik<br>4930412M03Rik<br>4931408D14Rik<br>5430421F17Rik<br>Apol7c<br>Cdh18<br>Crabp2<br>Cyp2j8<br>Defb35<br>Dnajc6                                                                                                                                                                          | Efcab4b<br>Fgf5<br>G630093K05Rik<br>G6pc<br>Gm13430<br>Gm3696<br>Gm428<br>Gm7710<br>Hbb-bh2<br>Hes2<br>l830127L07Rik                                                                                                                                      | Igfbp1<br>Lin28a<br>Mir344d-2<br>Myl6<br>Olfr1390<br>Olfr467<br>Olfr479<br>Olfr700<br>Osr2<br>Pax4<br>Sstr2                                                                                                                                       | Them4<br>Timm9<br>Tmem202<br>Tmem86a<br>Uhmk1<br>Vmn1r39<br>Wnk2<br>Zfp783<br>Zscan4c                                                                                                                                                                               |
| <b>CKOxHKO<br/>CWTxHWT</b> | <b>180</b> | 1110032F04Rik<br>1300002K09Rik<br>1700113A16Rik<br>1810034E14Rik<br>2310003L06Rik<br>2310030G06Rik<br>3110062M04Rik<br>8430408G22Rik<br>9030619P08Rik<br>Aadat<br>Abat<br>Ace<br>Acox2<br>Acsm1<br>Acsm3<br>Acsm5<br>Adh6-ps1<br>Agps<br>Akr1c14<br>Akr1c18<br>Amacr<br>Angptl7<br>Anks1b<br>Anxa13<br>Arsb<br>Atp11a | D630022N01Rik<br>Defa17<br>Defb19<br>Defb29<br>Depdc1b<br>Dhcr24<br>Dpy19l3<br>Em15<br>Erc2<br>Fads1<br>Fam55c<br>Fasn<br>Fbxl2<br>Fdft1<br>Fdps<br>Fmo5<br>Fn1<br>Galns<br>Galnt1<br>Ggct<br>Glt1d1<br>Gm11827<br>Gm128<br>Gm17767<br>Gm19648<br>Gm19963 | Igh-VJ558<br>Insig1<br>Itgb6<br>Itih2<br>Itih5<br>Ivd<br>Kcng1<br>Kif20b<br>Klf15<br>Klk1b11<br>Klk1b16<br>Ldhd<br>Ldlr<br>Lpl<br>Lrrc31<br>Ly6f<br>Mas1<br>Med14<br>Mep1b<br>Mfap3l<br>Mpv17l<br>Mrpl54<br>Myo5a<br>Naaladl2<br>Neurog2<br>Nlrc4 | S100g<br>Samd8<br>Sc4mol<br>Scd1<br>Sec14l3<br>Sectm1b<br>Sesn2<br>Slc22a19<br>Slc22a7<br>Slc25a48<br>Slc26a1<br>Slc35d2<br>Slc41a2<br>Slc6a15<br>Slc7a4<br>Slc8a1<br>Slc9a8<br>Slco1a1<br>Smcp<br>Snx31<br>Sqle<br>Srebf2<br>St8sia1<br>Sucnr1<br>Tbc1d10a<br>Tc2n |

|                |            |               |            |          |            |
|----------------|------------|---------------|------------|----------|------------|
|                |            | Atp8b4        | Gm4285     | Npas2    | Tfpi2      |
|                |            | B4galt5       | Gm6300     | Nsdhl    | Timd2      |
|                |            | Bcmo1         | Gm853      | Nt5e     | Tm7sf2     |
|                |            | Bdh1          | Gnmt       | Odc1     | Tmed6      |
|                |            | C1qtnf3       | Gpt        | Olfr153  | Tmem237    |
|                |            | C1rl          | Gstm7      | Osbp2    | Tmem26     |
|                |            | C7            | Gstt2      | Pacrg    | Tmem45b    |
|                |            | Calb1         | Gusb       | Pde6a    | Tmem97     |
|                |            | Car4          | H2-Q10     | Pelo     | Tmprss9    |
|                |            | Casc4         | Hbegf      | Pion     | Treh       |
|                |            | Cblc          | Hpd        | Plau     | Tspan13    |
|                |            | Cbs           | Hsd11b1    | Podn     | Tspan5     |
|                |            | Ccbl2         | Hsd17b11   | Proc     | Tstd1      |
|                |            | Ccl28         | Hsd17b2    | Proz     | Ttc39c     |
|                |            | Cdhr2         | Hsd3b2     | Ptpn22   | Ttr        |
|                |            | Cndp2         | Hsf2bp     | Rab20    | Ubiad1     |
|                |            | Coasy         | Idi1       | Rab27a   | Veph1      |
|                |            | Cpe           | Ido2       | Rhoc     | Wfdc16     |
|                |            | Cryaa         | Igf2bp1    | Rundc3a  | Zbtb44     |
| <b>CWTxCKO</b> | <b>297</b> | 0610012G03Rik | Foxred1    | Mir677   | Sdha       |
|                |            | 0610038B21Rik | Fpr-rs3    | Mkks     | Sdhc       |
|                |            | 1520402A15Rik | Fst        | Mmachc   | Sdhd       |
|                |            | 1700034P13Rik | Fv1        | Mpv17l2  | Serf2      |
|                |            | 1810014B01Rik | Gadd45gip1 | Mrpl34   | Sfxn3      |
|                |            | 1810021B22Rik | Gas6       | Mrpl47   | Shmt1      |
|                |            | 2310003L22Rik | Gbas       | Mrps23   | Skil       |
|                |            | 2310042D19Rik | Gca        | Mrps25   | Slc19a2    |
|                |            | 2310061I04Rik | Gja1       | Mrps27   | Slc1a5     |
|                |            | 2410015M20Rik | Glul       | Mtrf1l   | Slc22a4    |
|                |            | 2610017I09Rik | Gm10589    | Mtx2     | Slc43a2    |
|                |            | 2810454H06Rik | Gm13288    | Mtx3     | Slc45a3    |
|                |            | 4930402H24Rik | Gm14057    | Mug1     | Slc4a8     |
|                |            | 4930461G14Rik | Gm14379    | Myl12a   | Slit2      |
|                |            | 4930480K23Rik | Gm19265    | Myl6b    | Snora2b    |
|                |            | 4933401B06Rik | Gm20186    | Myo19    | Snora34    |
|                |            | 6430590A07Rik | Gm3613     | ND6      | Snord11    |
|                |            | 9130230N09Rik | Gm4567     | Ndrgr1   | Snord12    |
|                |            | A330021E22Rik | Gm4759     | Ndufa6   | Snord1b    |
|                |            | A630020A06    | Gm5113     | Ndufb2   | Snord42b   |
|                |            | Abcb9         | Gm561      | Ndufb5   | Snord58b   |
|                |            | Abhd11        | Gm7609     | Ndufb8   | Snord61    |
|                |            | Actg1         | Gm8842     | Ndufs1   | Snord68    |
|                |            | Adssl1        | Gm8995     | Ndufs2   | Sp100      |
|                |            | AK129341      | Gm9833     | Ndufs6   | Spa17      |
|                |            | Akr1c20       | Gm9917     | Ndufv2   | Spata17    |
|                |            | Alkbh7        | Gna14      | Nfyb     | Srp54c     |
|                |            | Asap2         | Gnb2l1     | Nipsnap1 | St6galnac5 |
|                |            | Aspn          | Gpt2       | Nkap     | Stc1       |
|                |            | Atg4d         | Hadhb      | Nmnat1   | Stra6      |
|                |            | Atp10d        | Hdhd2      | Olfm4    | Syne1      |
|                |            | Atp2b4        | Hist2h2ab  | Olfr113  | Synj2bp    |
|                |            | Atp4a         | Hk1        | Olfr1135 | Syt17      |
|                |            | Atp5d         | Idh3b      | Olfr1137 | Tarsl2     |

|                |            |               |               |          |          |
|----------------|------------|---------------|---------------|----------|----------|
|                |            | Atp5l         | Ii15ra        | Olfr1278 | Tas2r131 |
|                |            | B230369F24Rik | Inpp5j        | Olfr1445 | Tceb1    |
|                |            | BC002163      | Irs1          | Olfr1501 | Tfb2m    |
|                |            | BC037704      | Isyna1        | Olfr342  | Tfrc     |
|                |            | Bcar3         | Jrkl          | Olfr51   | Ticam1   |
|                |            | Bcr           | Jun           | Olfr74   | Tie1     |
|                |            | Blcap         | Kansl2        | Olfr866  | Tmco4    |
|                |            | Bri3bp        | Kansl3        | Olfr945  | Tmem143  |
|                |            | Cd200         | Kcnj2         | P2ry1    | Tmem241  |
|                |            | Cd38          | Klhdc8a       | Paqr5    | Tmem69   |
|                |            | Cdc14b        | Klk1b22       | Pclo     | Tomm5    |
|                |            | Cfhr2         | Ksr2          | Pdgfd    | Tsen54   |
|                |            | Chml          | Lace1         | Pdha1    | Tspan1   |
|                |            | Clca1         | Lad1          | Pdhb     | Ttc19    |
|                |            | Clec4b1       | LOC100048410  | Pdss2    | Ttc30a2  |
|                |            | Cnih4         | LOC100861803  | Pdxk     | Ube2a    |
|                |            | Cnnm4         | LOC100862007  | Pgam2    | Vdac2    |
|                |            | Cntfr         | LOC100862061  | Pi4kb    | Vdac3    |
|                |            | Cox4i1        | Lrig1         | Pnpla1   | Vipar    |
|                |            | Cox7b         | Lrp12         | Polr2h   | Vmn2r17  |
|                |            | Cpeb3         | Lrrc66        | Ppan     | Vps13d   |
|                |            | Cs            | Lym7          | Ppm1k    | Wbscr16  |
|                |            | Csprs         | Lzic          | Pptc7    | Wdr72    |
|                |            | Cst3          | MacroD1       | Prdx2    | Wfdc15b  |
|                |            | Cuedc1        | Malat1        | Prom2    | Xirp2    |
|                |            | D5ErtD579e    | Mapk4         | Prr5     | Xrcc6bp1 |
|                |            | D630041G03Rik | Mavs          | Ptgr2    | Zdhhc18  |
|                |            | D730048I06Rik | Mcee          | Ptpru    | Zdhhc8   |
|                |            | Dbn1          | Mcpt4         | Pygm     | Zfp456   |
|                |            | Ddo           | Me3           | Rab6b    | Zfp52    |
|                |            | Dennd2d       | Meaf6         | Rabggtb  | Zfp534   |
|                |            | Dennd5b       | Mir181a-2     | Rad1     | Zfp606   |
|                |            | Dhrs11        | Mir1933       | Rarb     | Zfp780b  |
|                |            | Dhrs3         | Mir1941       | Ripply3  | Zfp944   |
|                |            | Dld           | Mir1949       | Rmnd1    | Zfp953   |
|                |            | Dnajc28       | Mir218-1      | Rnmtl1   | Zfp955b  |
|                |            | Dnase1        | Mir27b        | Rny1     | Zfy2     |
|                |            | Dusp15        | Mir30b        | Rtp3     | Zxdb     |
|                |            | Etfa          | Mir30c-1      | Rusc1    |          |
|                |            | Fam164c       | Mir30c-2      | Samm50   |          |
|                |            | Fam73b        | Mir30e        | Sco1     |          |
| <b>HWTxHKO</b> | <b>212</b> | 1300001I01Rik | Csrp2         | Gm7367   | Olfr890  |
|                |            | 1700023F06Rik | Cux2          | Gm7732   | Olfr943  |
|                |            | 1700025D23Rik | Cyp2d13       | Gm8777   | Oog2     |
|                |            | 1810013D10Rik | Cyp46a1       | Gm904    | Pacsin1  |
|                |            | 2300002M23Rik | DOH4S114      | Gm9442   | Pcdhb7   |
|                |            | 2310046A06Rik | D630042P16Rik | Gpc1     | Pgls     |
|                |            | 2310068J16Rik | Dcaf4         | Gpr162   | Pla2g16  |
|                |            | 2500002B13Rik | Defa-ps1      | Gpx2     | Ppcs     |
|                |            | 3110047P20Rik | Dhrs2         | Grin2d   | Ppm1l    |
|                |            | 4921509C19Rik | Dnahc7b       | Grsf1    | Prokr2   |
|                |            | 4922502N22Rik | Dub2a         | Guca1b   | Psg-ps1  |
|                |            | 4930444G20Rik | E130306D19Rik | H2-M10.3 | Ptges3l  |

|                |            |               |               |              |           |
|----------------|------------|---------------|---------------|--------------|-----------|
|                |            | 4930478L05Rik | Efna2         | Hadha        | Pttg1     |
|                |            | 4930503H13Rik | Efs           | Hddc3        | Rab30     |
|                |            | 4930524N10Rik | Esrra         | Hist1h3f     | Retsat    |
|                |            | 4933407G14Rik | Expi          | Hlx          | Rhox4f    |
|                |            | 5730416F02Rik | Fam5b         | Hsd17b14     | Rnu11     |
|                |            | 5830473C10Rik | Fchsd1        | Ifitm6       | Rtkn2     |
|                |            | 9330159M07Rik | Fdx1          | Il25         | Sbk1      |
|                |            | 9430037G07Rik | Fgf6          | Kcna7        | Sema5b    |
|                |            | 9530046B11Rik | Fn3k          | Kif15        | Serpinb1a |
|                |            | Abhd8         | Ftcd          | Klhl34       | Slc22a20  |
|                |            | Abtb2         | Fxn           | Klrk1        | Slc25a11  |
|                |            | Acaa2         | G6pd2         | Krtap8-1     | Slc25a20  |
|                |            | Acacb         | Gapdh         | Ldlrad2      | Slc25a22  |
|                |            | Acadl         | Gbe1          | LOC100862601 | Slc38a1   |
|                |            | Acadvl        | Gckr          | LOC626410    | Slc41a3   |
|                |            | Acot2         | Gimap1        | Lrrc61       | Slc5a10   |
|                |            | Acot3         | Gm10081       | Mageb16      | Slc5a11   |
|                |            | Aim1l         | Gm10696       | Mir1839      | Slc6a17   |
|                |            | Als2cl        | Gm11937       | Mir210       | Spata21   |
|                |            | Alyref2       | Gm12302       | Mir299       | Spp1      |
|                |            | Ankrd34b      | Gm12356       | Mir466g      | Ssxb1     |
|                |            | Apoa2         | Gm12603       | Mir540       | Tm6sf2    |
|                |            | Arc           | Gm12830       | Mrpl10       | Tmem236   |
|                |            | Atp2a1        | Gm13369       | Myod1        | Tmie      |
|                |            | Atp5c1        | Gm1679        | Nefl         | Tpi1      |
|                |            | Atp5g1        | Gm19304       | Nmur1        | Uqcr11    |
|                |            | Atp5k         | Gm19484       | Nmur2        | Vegfb     |
|                |            | AY358078      | Gm19951       | Nr1i2        | Vmn1r188  |
|                |            | B3gnt3        | Gm20187       | Nrg3         | Vmn1r2    |
|                |            | BC018473      | Gm221         | Olfr103      | Vmn1r224  |
|                |            | BC048609      | Gm2897        | Olfr109      | Vmn1r58   |
|                |            | C2cd4a        | Gm3099        | Olfr1167     | Vmn2r20   |
|                |            | Ccnyl1        | Gm3500        | Olfr1347     | Vmn2r51   |
|                |            | Chchd2        | Gm3591        | Olfr429      | Vmn2r93   |
|                |            | Chrm1         | Gm5114        | Olfr513      | Wfdc9     |
|                |            | Chrng         | Gm5237        | Olfr574      | Wnt8a     |
|                |            | Clic6         | Gm5523        | Olfr622      | Wnt8b     |
|                |            | Cnr1          | Gm5567        | Olfr63       | Ybx2      |
|                |            | Cox5b         | Gm5785        | Olfr853      | Zfp352    |
|                |            | Crat          | Gm6086        | Olfr856-ps1  | Zfp629    |
|                |            | Creb3l3       | Gm732         | Olfr884      | Zfp704    |
| <b>CWTxHWT</b> | <b>308</b> | 1110002B05Rik | Cyp7b1        | ligp1        | Pzp       |
|                |            | 1110025L11Rik | D130020L05Rik | lpmk         | Rab32     |
|                |            | 1190003J15Rik | D630024D03Rik | Irx3         | Ralgps2   |
|                |            | 2010012O05Rik | Dcn           | ltpkb        | Ramp3     |
|                |            | 2310058D17Rik | Ddit4         | Izumo4       | Rassf1    |
|                |            | 2410022L05Rik | Ddt           | Jdp2         | Rassf4    |
|                |            | 2610002J02Rik | Defb1         | Jub          | Rdh5      |
|                |            | 2610100L16Rik | Degs1         | Klf9         | Retn      |
|                |            | 2700078E11Rik | Dhrs13        | Klhl21       | Rhov      |
|                |            | 2900026A02Rik | Dnaja1        | Klra2        | Rhox2c    |
|                |            | 3200002M19Rik | Dnaja4        | Lama3        | Rlf       |
|                |            | 4930405J17Rik | Dnajb1        | Lamc3        | Rnf145    |

|  |               |          |              |           |
|--|---------------|----------|--------------|-----------|
|  | 4930563M20Rik | Dpep1    | Larp1b       | Rnf183    |
|  | 5730507C01Rik | Dpp7     | Lbr          | Ropn1l    |
|  | 5730577I03Rik | Dqx1     | Letm1        | Rpp40     |
|  | A730020M07Rik | Dusp1    | LOC100039753 | Scd2      |
|  | AB099516      | Eid1     | LOC100861683 | Senp5     |
|  | Abhd14a       | Entpd2   | LOC100862607 | Serinc2   |
|  | Abi3bp        | Entpd7   | LOC100862646 | Serpina1c |
|  | Acaca         | Ethe1    | LOC666692    | Sim2      |
|  | Acad9         | Evc      | Lymr2        | Slc10a6   |
|  | Acat1         | Exoc5    | Lztr1        | Slc1a4    |
|  | Acsm2         | Ext1     | Map2k6       | Slc25a38  |
|  | Afmid         | F13b     | Map3k6       | Slc26a4   |
|  | Ahsa2         | Fa2h     | Mapk13       | Slitrk6   |
|  | Aldh3a2       | Fam100a  | Mcl1         | Sly       |
|  | Alk           | Fam103a1 | Med18        | Smoc2     |
|  | Amdhd2        | Fam107a  | Mettl7a3     | Smpdl3a   |
|  | Anapc16       | Fam176a  | Mir1186      | Snap29    |
|  | Ankrd44       | Fam187b  | Mir145       | Snhg11    |
|  | Aoah          | Fbxo36   | Mir1907      | Snord70   |
|  | Arhgef10l     | Fhit     | Mir1948      | Snord90   |
|  | Arpc5l        | Fkbp1    | Mir200b      | Sp9       |
|  | Asb13         | Fpr-rs4  | Mir24-1      | Spock3    |
|  | Ass1          | Frmd4b   | Mir26b       | Srd5a2    |
|  | Atp6v0d2      | Frzb     | Mir532       | Srebf1    |
|  | B230216N24Rik | Fuca2    | Mknk2        | St3gal5   |
|  | B4galt6       | Fxyd4    | Mmab         | Stbd1     |
|  | Bcat1         | Gadd45g  | Mrpl14       | Stk30     |
|  | Bcat2         | Gbp6     | Mug2         | Ston1     |
|  | Bst1          | Gcat     | Mvd          | Stxbp5l   |
|  | C4a           | Gjb2     | Myh10        | Synpr     |
|  | Cables1       | Gm10088  | Mylk         | Tchhl1    |
|  | Cacybp        | Gm10579  | Nat8         | Tesk2     |
|  | Car3          | Gm10914  | Nceh1        | Tmco3     |
|  | Ccdc6         | Gm11362  | Nphp1        | Tmed10    |
|  | Ccdc85c       | Gm13139  | Npnt         | Tmem207   |
|  | Cct8l1        | Gm13251  | Nr1d1        | Tmem28    |
|  | Cdh13         | Gm15348  | Nt5c3        | Tnfsf15   |
|  | Cdkn2aip      | Gm17771  | Nudt8        | Tprn      |
|  | Ces1e         | Gm19325  | Obfc2a       | Trappc9   |
|  | Chordc1       | Gm19327  | Obox2        | Trav12-2  |
|  | Chrdl1        | Gm19958  | Olfr1282     | Trav9d-3  |
|  | Chrna4        | Gm3579   | Olfr706      | Trp53inp1 |
|  | Chst11        | Gm4956   | Olfr724      | Trpv4     |
|  | Chst7         | Gm5069   | Olfr733      | Tsga10    |
|  | Cib1          | Gm5168   | Olfr825      | Ttll3     |
|  | Ckb           | Gm5784   | Olfr849      | Ttll7     |
|  | Cldn24        | Gm6976   | Papss1       | Uap1l1    |
|  | Cldn7         | Gm6996   | Pcdhb11      | Ubb       |
|  | Clec2h        | Gm7092   | Pcsk6        | Vmn1r198  |
|  | Cml2          | Gm9805   | Pdk3         | Vmn1r20   |
|  | Cmtm6         | Gpr133   | Penk         | Vmn1r42   |
|  | Cntnap2       | Gpr75    | Pfn3         | Vmn2r41   |
|  | Cntnap5a      | Gramd1b  | Pgm5         | Vmn2r61   |

|                |            |               |               |              |          |
|----------------|------------|---------------|---------------|--------------|----------|
|                |            | Col6a5        | Gstz1         | Pgp          | Vmn2r67  |
|                |            | Cpxm2         | H47           | Pi15         | Wasf3    |
|                |            | Crot          | Herc4         | Pim3         | Wdr55    |
|                |            | Csgalnact1    | Hhatl         | Pknox1       | Wrb      |
|                |            | Ctla2b        | Hist1h2bn     | Plcxd2       | Xpnpep2  |
|                |            | Ctxn3         | Hist2h3c2     | Plekha6      | Zbtb16   |
|                |            | Cxcl14        | Hmgb1-rs17    | Pomp         | Zfp317   |
|                |            | Cyb561        | Hmgcr         | Ppic         | Zfp442   |
|                |            | Cyp2d12       | Hmox1         | Ppp1r16b     | Zfp600   |
|                |            | Cyp2f2        | Hrg           | Ppp1r1b      | Zfp937   |
|                |            | Cyp4f14       | Hyi           | Ptger3       | Zhx3     |
|                |            | Cyp51         | Igfbp6        | Pyroxd2      | Zmynd10  |
| <b>CKOxHKO</b> | <b>277</b> | 1700007J10Rik | Cphx          | Gm5635       | Olfr419  |
|                |            | 2010001M06Rik | Crb1          | Gm5796       | Olfr427  |
|                |            | 2010109A12Rik | Creb3l1       | Gm6445       | Olfr61   |
|                |            | 2310042E22Rik | Cts3          | Gm7056       | Olfr705  |
|                |            | 2610028E06Rik | Cts8-ps       | Gm7358       | Olfr768  |
|                |            | 3010003L21Rik | Cyp2a22       | Gm9199       | Pank3    |
|                |            | 3010026O09Rik | Cyp2a5        | Gm949        | Pbld2    |
|                |            | 3110045C21Rik | Cyp2c67       | Gm9961       | Pcsk9    |
|                |            | 4732419C18Rik | Cyp2c69       | Gpam         | Piwil2   |
|                |            | 4921515J06Rik | Cyp2d9        | Gpr155       | Pkd1l2   |
|                |            | 4922505E12Rik | D14Ert449e    | Grid2ip      | Plac1    |
|                |            | 4930430J02Rik | D330028D13Rik | Grm6         | Plip     |
|                |            | 4930433N12Rik | Dcpp2         | Grpr         | Pnck     |
|                |            | 4930463O16Rik | Defa24        | H1fx         | Ppp2r5b  |
|                |            | 4930483J18Rik | Defa-rs1      | Hif3a        | Pqlc2    |
|                |            | 4930528G23Rik | Dera          | Hist1h3h     | Prh1     |
|                |            | 4933408J17Rik | Dgkb          | Hook2        | Prkd3    |
|                |            | 4933421A08Rik | Dlk2          | Ide          | Prss21   |
|                |            | 4933430I17Rik | Doc2b         | Ifna6        | Ptgds    |
|                |            | 4933433C11Rik | Dscaml1       | Ifnk         | Ptprq    |
|                |            | 5730528L13Rik | Dusp14        | Ifnz         | Rab11b   |
|                |            | 5930412G12Rik | Dusp23        | Il22ra1      | Rab33a   |
|                |            | 6030468B19Rik | E130215H24Rik | Il5ra        | Rasd1    |
|                |            | 6330415B21Rik | Ear5          | Ins2         | Rasl10b  |
|                |            | 7530416G11Rik | Ell3          | Isl2         | Rd3      |
|                |            | 9130209A04Rik | Elovl2        | Kif2b        | Reln     |
|                |            | A2m           | Epo           | Kis2         | Rps2     |
|                |            | A830010M20Rik | Eps8l3        | Lce1h        | Scand1   |
|                |            | Abca14        | Erb3          | Lefty1       | Scrn1    |
|                |            | Abhd3         | F12           | Lhx2         | Scrn2    |
|                |            | Acmsd         | Fam13a        | LOC100047957 | Sctr     |
|                |            | Adam23        | Fam13c        | LOC100861572 | Selm     |
|                |            | Adap1         | Fbp2          | LOC100861893 | Sftpa1   |
|                |            | Adcy2         | Fbxo46        | LOC433461    | Siglece  |
|                |            | Agmat         | Fndc5         | LOC626049    | Slc16a10 |
|                |            | Aldh1l2       | Fnip2         | LOC670059    | Slc17a4  |
|                |            | Aldh4a1       | Foxq1         | Lrrc50       | Slc18a1  |
|                |            | Angptl4       | G0s2          | Lypd3        | Slc33a1  |
|                |            | Apoh          | Gabrb3        | Masp1        | Slc6a5   |
|                |            | Apold1        | Gatsl2        | Meig1        | Snca     |
|                |            | Arsg          | Gip           | Mir1192      | Sncb     |

|  |               |         |            |         |
|--|---------------|---------|------------|---------|
|  | Arx           | Gm10318 | Mir124a-2  | Snx20   |
|  | Azi1          | Gm10509 | Mir133a-2  | Spats2l |
|  | BC048602      | Gm11564 | Mir1945    | Spink8  |
|  | BC051070      | Gm12248 | Mir212     | Sult1b1 |
|  | BC051077      | Gm14407 | Mir3091    | Susd4   |
|  | BC067074      | Gm15070 | Mir486     | Syna    |
|  | Bean1         | Gm15315 | Mir5109    | Sys1    |
|  | Bid           | Gm15645 | Mir598     | Tbx10   |
|  | Bms1          | Gm15983 | Mir717     | Timm8a1 |
|  | Bnpl          | Gm16157 | Mir9-1     | Tmem169 |
|  | C130050O18Rik | Gm16677 | Mir92b     | Tmem25  |
|  | C330046G03Rik | Gm17416 | Mpped2     | Tmem64  |
|  | C530044C16Rik | Gm19277 | Mtmr7      | Tmigd1  |
|  | Caly          | Gm19281 | Myog       | Tram2   |
|  | Camk1g        | Gm19462 | Naa11      | Trh     |
|  | Car9          | Gm1976  | Narf       | Tstd2   |
|  | Cbr2          | Gm2046  | Ncrna00086 | Tsx     |
|  | Ccbl1         | Gm22    | Neurod1    | Ttc39a  |
|  | Ccdc164       | Gm2837  | Nod2       | Ttyh2   |
|  | Cckbr         | Gm2921  | Npm3       | Ucn2    |
|  | Ccl26         | Gm3086  | Nt5dc2     | Ugt3a1  |
|  | Ces2h         | Gm3238  | Ntn1       | Vmn1r16 |
|  | Clip4         | Gm5099  | Olfm3      | Vmn1r82 |
|  | Cntn5         | Gm514   | Olfr1061   | Wnt2b   |
|  | Col6a6        | Gm5329  | Olfr1131   | Zfp239  |
|  | Col8a1        | Gm5346  | Olfr1219   | Zmynd12 |
|  | Colec10       | Gm5475  | Olfr1301   |         |
|  | Comt          | Gm5480  | Olfr315    |         |
|  | Coro1c        | Gm5591  | Olfr398    |         |
