# Supplementary material for: Loss of Renal Tubular PGC-1α Exacerbates Diet-Induced Renal Steatosis and Age-Related Urinary Sodium Excretion in Mice
Source: PubMed Central journal article supplement (PMC4963111; doi:10.1371/journal.pone.0158716), 2016-07-27
Supplement: pone.0158716.s009.pdf [file pone.0158716.s009.pdf]

S3 Table

| Labels                        | Number of genes | Genes                                                                                                                                                                                                         |                                                                                                                                                                                                            |                                                                                                                                                                                                |                                                                                                                                                                                     |
|-------------------------------|-----------------|---------------------------------------------------------------------------------------------------------------------------------------------------------------------------------------------------------------|------------------------------------------------------------------------------------------------------------------------------------------------------------------------------------------------------------|------------------------------------------------------------------------------------------------------------------------------------------------------------------------------------------------|-------------------------------------------------------------------------------------------------------------------------------------------------------------------------------------|
| CWTxCKO<br>CWTxHWT<br>HWTxHKO | 2               | Bex4<br>Cpn1                                                                                                                                                                                                  |                                                                                                                                                                                                            |                                                                                                                                                                                                |                                                                                                                                                                                     |
| CKOxHKO<br>CWTxCKO<br>HWTxHKO | 2               | Mogat2<br>Trf                                                                                                                                                                                                 |                                                                                                                                                                                                            |                                                                                                                                                                                                |                                                                                                                                                                                     |
| CKOxHKO<br>CWTxCKO<br>CWTxHWT | 2               | Agxt2l1<br>Mgst1                                                                                                                                                                                              |                                                                                                                                                                                                            |                                                                                                                                                                                                |                                                                                                                                                                                     |
| CKOxHKO<br>CWTxHWT<br>HWTxHKO | 5               | Ccrn4l<br>Cd19<br>Cdca7l<br>Hp<br>Serpina3n                                                                                                                                                                   |                                                                                                                                                                                                            |                                                                                                                                                                                                |                                                                                                                                                                                     |
| CWTxCKO<br>HWTxHKO            | 82              | 5330417C22Rik<br>Abca13<br>Abcd4<br>Abp1<br>Acot11<br>Acy1<br>Aebp1<br>Aldh1l2<br>Angptl7<br>Arl4a<br>Arnt2<br>Atp6v1g3<br>BC064078<br>Blnk<br>C2<br>C8a<br>Car3<br>Casr<br>Ccdc3<br>Cdhr2<br>Ces1g           | Clu<br>Cyp2d12<br>D10Bwg1379e<br>D630023F18Rik<br>Dapp1<br>Dgkb<br>Emb<br>Eps8l1<br>Etnk2<br>Fads1<br>Fetub<br>Foxred2<br>Gabrb3<br>Gamt<br>Gm1332<br>Gm4952<br>Gpc3<br>Gpr30<br>Gulo<br>Hexa<br>Hist2h2be | Hkdc1<br>Hpse2<br>Il17rb<br>Itgb4<br>Kif6<br>Lgals3bp<br>Limd2<br>LOC621549<br>Lxn<br>Mboat1<br>Mt2<br>Muc1<br>Myo3b<br>Myof<br>Ngfrap1<br>Nlrc4<br>Npl<br>Nup93<br>Olfr1286<br>Pamr1<br>Papln | Psat1<br>Ptpn22<br>Rab42-ps<br>Rgs11<br>Rhou<br>Sectm1b<br>Slc8a1<br>Snhg11<br>Snx31<br>Spink8<br>Stap1<br>Stk32b<br>Sult1c2<br>Susd1<br>Susd2<br>Tmem97<br>Trpc5<br>Ttr<br>Zcchc16 |
| CWTxCKO<br>CWTxHWT            | 85              | 1700003F12Rik<br>1700029H14Rik<br>2810025M15Rik<br>3300005D01Rik<br>4930444G20Rik<br>4930447K03Rik<br>4930591A17Rik<br>4933433G19Rik<br>5830473C10Rik<br>7530416G11Rik<br>A430107O13Rik<br>Adam24<br>Adamts13 | Col9a3<br>Cxcl1<br>Dkk4<br>Drd5<br>Efemp1<br>Gli1<br>Gm11564<br>Gm13271<br>Gm13430<br>Gm16197<br>Gm16519<br>Gm5154<br>Gm7102                                                                               | Krt34<br>Lce3c<br>Lcn6<br>LOC100861931<br>Lzts1<br>Maged2<br>Mir184<br>Mir486<br>Mir551b<br>Mir92b<br>Mybpc2<br>Myod1<br>Olfr1226                                                              | Pla2g10<br>Pou2af1<br>Prph2<br>Prss35<br>Rasd2<br>Rbp4<br>Sema3c<br>Serpina3h<br>Slc24a4<br>Slc39a5<br>Sox10<br>Sprr2e<br>Svs5                                                      |

|                            |           |                                                                                                                                                                                                                                                       |                                                                                                                                                                                                                             |                                                                                                                                                                                                                                             |                                                                                                                                                                                                                                                 |
|----------------------------|-----------|-------------------------------------------------------------------------------------------------------------------------------------------------------------------------------------------------------------------------------------------------------|-----------------------------------------------------------------------------------------------------------------------------------------------------------------------------------------------------------------------------|---------------------------------------------------------------------------------------------------------------------------------------------------------------------------------------------------------------------------------------------|-------------------------------------------------------------------------------------------------------------------------------------------------------------------------------------------------------------------------------------------------|
|                            |           | Adcy2<br>Angpt4<br>Arhgap33<br>B3gnt8<br>BB319198<br>Bpifb2<br>Cd300lh<br>Cdh24<br>Cldn11                                                                                                                                                             | Gpr31b<br>Grin3b<br>Gsdmcl2<br>Gsx1<br>Igsf10<br>Kcna2<br>Kcnn3<br>Klhdc1                                                                                                                                                   | Olfr1428<br>Olfr1502<br>Olfr382<br>Olfr410<br>Olfr93<br>Orm1<br>P2rx2<br>Pcdh8                                                                                                                                                              | Syt5<br>Tcf24<br>Tex19.2<br>Tmcc2<br>Trip13<br>Trpd52l3<br>Ugt2b34<br>Zp4-ps                                                                                                                                                                    |
| <b>CWTxHWT<br/>HWTxHKO</b> | <b>1</b>  | Lrrc61                                                                                                                                                                                                                                                |                                                                                                                                                                                                                             |                                                                                                                                                                                                                                             |                                                                                                                                                                                                                                                 |
| <b>CKOxHKO<br/>HWTxHKO</b> | <b>61</b> | A730028G07Rik<br>Aacs<br>Adamts16<br>Arl13b<br>Arsj<br>AU041133<br>C030013D06Rik<br>C9<br>Cbfb<br>Ccdc21<br>Ccl9<br>Ces2g<br>Cidec<br>Defb2<br>Dleu2<br>Fcamr                                                                                         | Fkbp1b<br>Foxq1<br>Gbp7<br>Gm13315<br>Gm20236<br>Gm20257<br>Gm3219<br>Gm7429<br>Gpr64<br>Hoxb3<br>Ikzf4<br>Il7r<br>Irgm2<br>Jarid2<br>Kif23                                                                                 | Klk1b8<br>Maob<br>Mir10a<br>Mir3101<br>Mir532<br>Mrpl27<br>Ntn4<br>Ogdhl<br>Pappa<br>Pik3r3<br>Pilrb1<br>Prr5<br>Rasgrp1<br>Riok1<br>Rpl5                                                                                                   | Rtn1<br>Slc16a14<br>Slc4a9<br>Snora20<br>Socs2<br>Sp4<br>Tcp1<br>Tet2<br>Try5<br>Tspan6<br>Vsig1<br>Zfp180<br>Zfp449<br>Zfp52<br>Zwilch                                                                                                         |
| <b>CKOxHKO<br/>CWTxHWT</b> | <b>99</b> | 4930572J05Rik<br>4933409K07Rik<br>9530091C08Rik<br>Abcb1a<br>Abcb1b<br>Acnat1<br>Agt<br>Aim1l<br>Apob<br>Apoe<br>Atr<br>Brca2<br>C3<br>C730036E19Rik<br>Car14<br>Ccdc141<br>Cdc14a<br>Cdkl5<br>Cklf<br>Cml1<br>Col27a1<br>Cp<br>Dak<br>Dhrs7<br>Dusp9 | Dzip1<br>Eci1<br>Ednra<br>Egln3<br>Eid3<br>Fabp5<br>Fam78a<br>Fgf18<br>Gc<br>Gldc<br>Gm13298<br>Gm20342<br>Gm6614<br>Gm7457<br>Gria3<br>Gsto1<br>Hmgcs2<br>Hoxa1<br>Hoxc8<br>Id1<br>Id2<br>Id3<br>Immp2l<br>Kcna4<br>Kcnip2 | Klk1b7-ps<br>Leprel1<br>Med24<br>Mmp12<br>Mpzl2<br>Mybl1<br>Nbeal2<br>Nmrk1<br>Nrxn2<br>Pbx4<br>Pck1<br>Pdk1<br>Pdxk<br>Pklr<br>Pla2g5<br>Prlr<br>Ptgs2<br>Pvalb<br>Rdh18-ps<br>Rgs5<br>Serinc5<br>Slc13a2<br>Slc13a3<br>Slc16a6<br>Slc19a3 | Slc25a25<br>Slc2a5<br>Slc5a10<br>Slc6a4<br>Slc7a12<br>Smad7<br>Snora16a<br>Snora17<br>Snora31<br>Snora70<br>Spns2<br>St3gal1<br>Taf1d<br>Tfcp2l1<br>Tmie<br>Tnxb<br>Trim34a<br>Tspan18<br>Ugt1a10<br>Vkorc1<br>Wee1<br>Wsb1<br>Zfp161<br>Zfp454 |

|                |            |               |               |               |           |
|----------------|------------|---------------|---------------|---------------|-----------|
| <b>CWTxCKO</b> | <b>338</b> | 1500011B03Rik | Ctsz          | Has3          | Olfr437   |
|                |            | 1700007J10Rik | Cxcl13        | Heph          | Olfr525   |
|                |            | 1700025N23Rik | Cxcl16        | Hhip          | Olfr541   |
|                |            | 1700121N20Rik | Cyp26c1       | Htr3a         | Olfr66    |
|                |            | 1810046K07Rik | Cyp2a12       | Hvcn1         | Olfr661   |
|                |            | 2010002N04Rik | Cyp2c69       | I830127L07Rik | Panx1     |
|                |            | 2300005B03Rik | Cyp2d11       | Ifna7         | Pbld2     |
|                |            | 2310007B03Rik | Cyp2r1        | Igf2bp1       | Pcdh17    |
|                |            | 2610016A17Rik | D17H6S56E-5   | Ighv1-72      | Pdcd1     |
|                |            | 3110035E14Rik | D330028D13Rik | Igh-VJ558     | Pdilt     |
|                |            | 3110082I17Rik | Dact3         | Iglv1         | Pdlim3    |
|                |            | 3930402G23Rik | Defa-rs1      | Il17c         | Pgrmc1    |
|                |            | 4922505E12Rik | Defb35        | Il5ra         | Pkd1l2    |
|                |            | 4930433N12Rik | Defb42        | Irx6          | Plagl1    |
|                |            | 4930459I23Rik | Dgkz          | Isl2          | Plin4     |
|                |            | 4930474N09Rik | Dnahc2        | Ilgam         | Pmaip1    |
|                |            | 4930483J18Rik | Dnajc5b       | Itgfb2        | Ppargc1a  |
|                |            | 4930589P08Rik | Dnali1        | Kcne1l        | Pqlc2     |
|                |            | 4931403M11Rik | Dscaml1       | Kcnh3         | Prh1      |
|                |            | 4933405L10Rik | Dusp2         | Kcnh7         | Prom1     |
|                |            | 4933408J17Rik | E030030I06Rik | Kcnk13        | Psg19     |
|                |            | 4933429O19Rik | E230025N22Rik | Kcnk7         | Psors1c2  |
|                |            | 4933430I17Rik | Ear5          | Kif18b        | Pspn      |
|                |            | 4933433C11Rik | Efna3         | Klrb1f        | Ptgds     |
|                |            | 5430437J10Rik | Eps8l3        | Krt24         | Pycr1     |
|                |            | 9030619P08Rik | Fam13c        | Krt31         | Rab9b     |
|                |            | 9130008F23Rik | Fam171a2      | Lce1i         | Rasgef1a  |
|                |            | 9230117E06Rik | Fam55c        | Lcn8          | Rd3       |
|                |            | 9530026F06Rik | Fbl1l         | Lefty1        | Reln      |
|                |            | A530006G24Rik | Fcgbp         | Leprel2       | Rhobtb3   |
|                |            | A530020G20Rik | Fgf22         | Lhfp12        | Rhox3g-ps |
|                |            | A630038E17Rik | Fgfbp1        | Lhfp14        | Rnf39     |
|                |            | Abpa          | Fkbp6         | LOC100040974  | Rpl13     |
|                |            | Acat3         | Foxi1         | LOC100861572  | Scrn1     |
|                |            | Ace2          | Foxi3         | Lpar2         | Sctr      |
|                |            | Actn3         | Fxc1          | Lrfrn1        | Sdk1      |
|                |            | Adam23        | G630093K05Rik | Lrrc50        | Serp2     |
|                |            | Adprhl2       | Galnt13       | Lrrn3         | Serpinb9  |
|                |            | Adra2c        | Galnt9        | Lrrtm1        | Serpind1  |
|                |            | Afp           | Gcsh          | Ltbp2         | Sez6l2    |
|                |            | Ano9          | Gdf2          | Luzp2         | Sfn       |
|                |            | Apcdd1        | Gjb4          | Lypd3         | Sftpb     |
|                |            | Apom          | Gjc1          | Mab21l3       | Shd       |
|                |            | Arhgap23      | Gltpd2        | Mageb16-ps1   | Sidt1     |
|                |            | Arhgdig       | Gm10100       | Magi2         | Six6      |
|                |            | Asb11         | Gm10318       | Man2b2        | Slc17a4   |
|                |            | AU016765      | Gm10584       | March10       | Slc17a9   |
|                |            | B4galt7       | Gm10636       | Med7          | Slc34a2   |
|                |            | Bach2         | Gm10782       | Mir124a-2     | Slc6a5    |
|                |            | Barx2         | Gm1096        | Mir187        | Slc7a15   |
|                |            | BC067074      | Gm11541       | Mir191        | Snca      |
|                |            | Bco2          | Gm12248       | Mir194-1      | Sncb      |
|                |            | Bdnf          | Gm13080       | Mir194-2      | Sostdc1   |

|                |            |               |               |            |           |
|----------------|------------|---------------|---------------|------------|-----------|
|                |            | Bmp15         | Gm13286       | Mir1943    | Sox9      |
|                |            | Bms1          | Gm14047       | Mir3091    | Sp6       |
|                |            | Bpifb9b       | Gm14407       | Mir337     | Sssca1    |
|                |            | Btnl1         | Gm17540       | Mir421     | Stab2     |
|                |            | C130050O18Rik | Gm19462       | Mir450-2   | Syna      |
|                |            | C1s           | Gm1976        | Mir467e    | Tas1r2    |
|                |            | C230036H16Rik | Gm3086        | Mir574     | Tbx22     |
|                |            | C330018A13Rik | Gm3279        | Mir669m-1  | Tdpoz2    |
|                |            | C630004H02Rik | Gm4371        | Mir717     | Tgfa      |
|                |            | C86187        | Gm4651        | Mob3a      | Tgm5      |
|                |            | C86695        | Gm4871        | Mreg       | Tm4sf19   |
|                |            | Capn8         | Gm4934        | Msx2       | Tm7sf3    |
|                |            | Catsperg1     | Gm5094        | Mt1        | Tmem169   |
|                |            | Cbr2          | Gm5099        | Muc2       | Tmem235   |
|                |            | Ccdc121       | Gm5334        | Myh6       | Tmem8c    |
|                |            | Ccdc164       | Gm5591        | Myo5a      | Tnni2     |
|                |            | Ccl26         | Gm6300        | Naa11      | Trdn      |
|                |            | Cd300a        | Gm6978        | Ncan       | Trim45    |
|                |            | Cdsn          | Gm7168        | Ncrna00086 | Trim59    |
|                |            | Cerkl         | Gm7361        | Neu4       | Trpc7     |
|                |            | Ces2h         | Gm8439        | Nkx2-9     | Trpm5     |
|                |            | Cit           | Gm9782        | Notum      | Tshr      |
|                |            | Col3a1        | Gng4          | Npm3       | Tsx       |
|                |            | Col5a2        | Gpr50         | Nqo1       | Vmn1r4    |
|                |            | Cpz           | Grem1         | Ntn3       | Vmn2r3    |
|                |            | Crabp1        | Grin1         | Nusap1     | Wbscr28   |
|                |            | Crb1          | Grin2c        | O3far1     | Wdr89     |
|                |            | Creb3l1       | Grm6          | Olfr1219   | Wnt4      |
|                |            | Cryaa         | Gstm3         | Olfr1301   | Zfp239    |
|                |            | Crybb3        | Gucy1a3       | Olfr1487   | Zswim3    |
|                |            | Ctps          | H1fx          | Olfr294    |           |
|                |            | Ctsc          | H2afb1        | Olfr331    |           |
| <b>HWTxHKO</b> | <b>263</b> | 1190003J15Rik | D630024D03Rik | Igkv4-72   | Samd5     |
|                |            | 1700029I01Rik | D930048N14Rik | Impact     | Sc4mol    |
|                |            | 1700123O21Rik | Dcaf12l1      | Insrr      | Scd2      |
|                |            | 1700125D06Rik | Defb29        | Itih2      | Scel      |
|                |            | 1810063I02Rik | Dnahc5        | Izumo4     | Sectm1a   |
|                |            | 2010001M09Rik | Dnajb2        | Jdp2       | Senp5     |
|                |            | 2310081J21Rik | Dsp           | Kcnj13     | Serpina1c |
|                |            | 2810474O19Rik | Dtna          | Kcnk5      | Serpina1d |
|                |            | 4930502E18Rik | Dusp1         | Klra2      | Serpinc1  |
|                |            | 5330426P16Rik | E030024N20Rik | Krt14      | Sim1      |
|                |            | 5730577I03Rik | E230016K23Rik | L1cam      | Slc1a3    |
|                |            | 9030025P20Rik | Eid2          | Lama1      | Slc1a4    |
|                |            | 9230110C19Rik | Elfn1         | Lama3      | Slc26a4   |
|                |            | AB099516      | Endou         | Lamc3      | Slc38a6   |
|                |            | Ablim3        | Ephb2         | Lass4      | Slco3a1   |
|                |            | Ace           | Esrp1         | Ldhd       | Sned1     |
|                |            | Actn1         | F13b          | Lipg       | Snord104  |
|                |            | Adam11        | Fabp7         | LOC621118  | Snord70   |
|                |            | Adamtsl3      | Fam103a1      | Lrp11      | Sntb1     |
|                |            | Agxt2         | Fam107a       | Maoa       | Soat1     |
|                |            | Akr1c13       | Fam174b       | Mgat4a     | Sorbs2    |

|                |            |               |           |            |           |
|----------------|------------|---------------|-----------|------------|-----------|
|                |            | Amdhd2        | Fasn      | Mgmt       | Spcs2     |
|                |            | Amn           | Fbxo36    | Mir1186    | Sprr2a1   |
|                |            | Ank2          | Fbxo6     | Mir145     | Sqle      |
|                |            | Anxa9         | Fbxw9     | Mir200b    | Srgap3    |
|                |            | Aoah          | Fdps      | Mir24-1    | St6gal1   |
|                |            | Asah1         | Fuca2     | Mir669j    | Sytl2     |
|                |            | Atp6v0e2      | Fxyd3     | Mirlet7c-2 | Sytl5     |
|                |            | Atxn7l1       | Fxyd4     | Mknk2      | Tagap     |
|                |            | Atxn7l2       | Galns     | Myef2      | Tagln2    |
|                |            | Avpr1a        | Gcat      | Mylk       | Tceal1    |
|                |            | B4galt1       | Gdf11     | Nat2       | Tchhl1    |
|                |            | Bambi-ps1     | Glb1l2    | Nhlrc4     | Terc      |
|                |            | Bcat1         | Gm10416   | Nipal2     | Tfap2b    |
|                |            | Bmpr1b        | Gm11559   | Npc2       | Tmed6     |
|                |            | Btg2          | Gm12824   | Npr2       | Tmem207   |
|                |            | C130026I21Rik | Gm13139   | Nrbp2      | Tmem30b   |
|                |            | C1qtnf3       | Gm13251   | Nrg1       | Tox3      |
|                |            | C330002G04Rik | Gm15348   | Olfr1337   | Trav9d-3  |
|                |            | Camk1d        | Gm20115   | Olfr694    | Trmt112   |
|                |            | Capn6         | Gm2423    | Olfr810    | Trp53inp1 |
|                |            | Car13         | Gm5432    | Parp11     | Tspan13   |
|                |            | Cav1          | Gpr110    | Parp8      | Tspan8    |
|                |            | Cbs           | Gpr112    | Pgm5       | Tstd1     |
|                |            | Ccdc159       | Gpr39     | Phf15      | Tuba1a    |
|                |            | Cckar         | Gprasp2   | Phgr1      | Uap1l1    |
|                |            | Cdc25b        | Gpt       | Phlda2     | Ugt2a3    |
|                |            | Cdc42se1      | Grhl2     | Pisd-ps2   | Vgll4     |
|                |            | Cdk14         | Gstp1     | Pkib       | Vill      |
|                |            | Cdkn1a        | H2afj     | Plcg2      | Vmn1r27   |
|                |            | Ceacam2       | H2-DMb2   | Plcx2      | Vmn1r32   |
|                |            | Chrdl1        | Hbegf     | Plxnb1     | Vmn1r45   |
|                |            | Chrna4        | Hebp1     | Ppic       | Wbp5      |
|                |            | Chst11        | Hepacam2  | Ppp1r16b   | Wnk4      |
|                |            | Cldn8         | Hexb      | Ppp1r1a    | Xbp1      |
|                |            | Cldn9         | Hist1h2bn | Psd4       | Zbtb16    |
|                |            | Ctxn1         | Hist1h4i  | Ptpn13     | Zc4h2     |
|                |            | Cxcl3         | Hist2h3b  | Pvr        | Zfp335    |
|                |            | Cxx1c         | Hist2h3c2 | Pzp        | Zfp442    |
|                |            | Cyp2a4        | Hmox1     | Rab32      | Zfp46     |
|                |            | Cyp2d40       | Hmx2      | Rcan1      | Zfp760    |
|                |            | Cyp4f16       | Hoxb8     | Rgn        | Zfp781    |
|                |            | Cyp4v3        | Hyi       | Rgs2       | Zfp810    |
|                |            | Cyp7b1        | Ighg      | Rhox2c     | Zfp873    |
|                |            | Cys1          | Igk-V1    | Rnf145     | Zfp937    |
|                |            | D430041D05Rik | Igkv4-59  | Ropn1l     |           |
| <b>CWTxHWT</b> | <b>326</b> | 1700001G17Rik | Cox6b2    | Gm6086     | Pla2g16   |
|                |            | 1700041M05Rik | Creb3l3   | Gm6222     | Pldi      |
|                |            | 1700067G17Rik | Cstf2     | Gm7385     | Ppcs      |
|                |            | 1700095J03Rik | Cygb      | Gm9442     | Rab27b    |
|                |            | 1700110C19Rik | Cyp2d13   | Gm9979     | Rab30     |
|                |            | 2010300F17Rik | Cyp2d26   | Gpr149     | Rab40b    |
|                |            | 2300002M23Rik | Cyp4a10   | Gpr27      | Ralgapa2  |
|                |            | 2410016O06Rik | Cyp4a14   | Gprin3     | Rasa4     |

|  |               |               |              |           |
|--|---------------|---------------|--------------|-----------|
|  | 2610018G03Rik | Cyp4a31       | Grin2d       | Rasal3    |
|  | 2610020C07Rik | D0H4S114      | Grk4         | Ren1      |
|  | 2810405K02Rik | D630003M21Rik | Gsta1        | Rgs9bp    |
|  | 2810408M09Rik | D630042P16Rik | Gsx2         | Rhbdl3    |
|  | 3230401D17Rik | D830015G02Rik | Hbb-bh2      | Rhox4f    |
|  | 3830408C21Rik | D930030D11Rik | Hlf          | Ripk3     |
|  | 4632404H12Rik | Ddhd2         | Hnrnpd       | Rnu11     |
|  | 4930401B11Rik | Dgkh          | Homer3       | Rpa2      |
|  | 4930467K11Rik | Dub1          | Hoxc12       | Rps13     |
|  | 4930524N10Rik | Dyx1c1        | Idi2         | Rps19     |
|  | 4930540M05Rik | E130112N10Rik | Ifi44        | Rps8      |
|  | 4930563F08Rik | E130317F20Rik | Igf2bp2      | Rrm1      |
|  | 4930583I09Rik | Ear2          | Il25         | Sh2d1b2   |
|  | 4931403G20Rik | Ech1          | Jph1         | Sh3gl3    |
|  | 4932416K20Rik | Edil3         | Katna1       | Slc12a5   |
|  | 4933411K16Rik | Efcab4b       | Kcnmb3       | Slc13a5   |
|  | 4933422A05Rik | Eif2s3y       | Khk          | Slc22a20  |
|  | 5430421F17Rik | Eif4a3        | Kif15        | Slc25a20  |
|  | 5730435O14Rik | Emr4          | Klhl34       | Slc25a22  |
|  | 5730457N03Rik | Ern2          | Krt6b        | Slc27a1   |
|  | 9430015G10Rik | Esp3          | Kynu         | Slc5a1    |
|  | 9530026P05Rik | Esr2          | Large        | Sln2      |
|  | A430093F15Rik | Evpl          | Lcn2         | Slitrk4   |
|  | A830060N17    | Expi          | Ldlrad2      | Slx1b     |
|  | Abcc4         | Fabp1         | Lgals4       | Smad9     |
|  | Abcg1         | Fam166b       | Lhx8         | Snora30   |
|  | Abhd15        | Fam18a        | LOC100861753 | Snora41   |
|  | Acaa1b        | Fam50b        | LOC664924    | Snord55   |
|  | Acaa2         | Fam5b         | Lst1         | Snord88c  |
|  | Acadvl        | Fam83g        | Map3k9       | Sox30     |
|  | Acot2         | Fbxl16        | Mcpt-ps1     | Spata9    |
|  | Acot3         | Fchsd1        | Mfsd12       | Spatc1    |
|  | Acot4         | Fgf14         | Mgl1         | Spc25     |
|  | Acot6         | Fgf16         | Mif          | Spib      |
|  | Acsf2         | Fgfr1         | Mir1190      | Spint4    |
|  | Agpat9        | Fndc8         | Mir1930      | Spp2      |
|  | Aldh1a1       | Foxb2         | Mir1938      | Spred3    |
|  | Aldh1a7       | Foxj2         | Mir301b      | Sprr1b    |
|  | Alyref2       | Frmd5         | Mir3070b     | Ssxa1     |
|  | Apoa2         | Fsd1          | Mir3073      | Stfa2l1   |
|  | Apobr         | Fus           | Mir3098      | Syt3      |
|  | Apoc3         | Fut4-ps1      | Mir339       | Tcf19     |
|  | Arhgap19      | G6pd2         | Mir342       | Tet1      |
|  | Arhgef9       | Gal3st2       | Mir455       | Tgm2      |
|  | Armcx4        | Gan           | Mir466g      | Tigd3     |
|  | Asrgl1        | Gapdhs        | Mir5125      | Timp1     |
|  | Atp12a        | Gast          | Mir695       | Tm6sf2    |
|  | Atp2a1        | Gbe1          | Mir744       | Tmem59l   |
|  | Atp2a3        | Gbx2          | Mirlet7a-2   | Tmem91    |
|  | AU040972      | Glp1r         | Mpl          | Tnfaip8l3 |
|  | AW011738      | Gm10503       | Ms4a1        | Trim12c   |
|  | AY358078      | Gm10639       | Mup5         | Trim62    |
|  | BC066135      | Gm10696       | Ngfr         | Trpv2     |

|                |            |                |         |              |          |
|----------------|------------|----------------|---------|--------------|----------|
|                |            | BC089597       | Gm10787 | Nr0b1        | Tspan2   |
|                |            | Bcl11b         | Gm10923 | Olfr1015     | Tubb5    |
|                |            | Bhlhe22        | Gm10941 | Olfr1320     | Tubg2    |
|                |            | Btbd19         | Gm11110 | Olfr1335     | Txndc8   |
|                |            | C2cd4a         | Gm11744 | Olfr156      | Uchl1    |
|                |            | C5ar1          | Gm12356 | Olfr325      | Ucp2     |
|                |            | Cc2d2b         | Gm13369 | Olfr401      | Usp49    |
|                |            | Cd14           | Gm14762 | Olfr522      | Vmn1r2   |
|                |            | Cd5            | Gm15628 | Olfr582      | Vmn2r20  |
|                |            | Cd80           | Gm15867 | Olfr859      | Vwce     |
|                |            | Cdkn1c         | Gm19654 | Otp          | Wdhd1    |
|                |            | Cdt1           | Gm20095 | Padi1        | Wisp1    |
|                |            | Cep78          | Gm20279 | Pax6os1      | X99384   |
|                |            | Ces1d          | Gm20382 | Pcdhb7       | Zfp423   |
|                |            | Chaf1b         | Gm2564  | Pcx          | Zfp488   |
|                |            | Chchd2         | Gm2863  | Pdap1        | Zfp612   |
|                |            | Chrm1          | Gm3776  | Pde5a        | Zfp648   |
|                |            | Clec18a        | Gm4301  | Pex11a       | Zfp712   |
|                |            | Clic6          | Gm5237  | Phf11        | Zfp932   |
|                |            | Cnr1           | Gm5451  | Pif1         |          |
|                |            | Coro1a         | Gm5478  | Pknx2        |          |
| <b>CKOxHKO</b> | <b>367</b> | 1500012F01Rik  | Entpd1  | Maml3        | Shroom1  |
|                |            | 1520402A15Rik  | Ep400   | Map3k12      | Skil     |
|                |            | 1700020D05Rik  | Ephb4   | Mapk4        | Skp2     |
|                |            | 1700034F02Rik  | Ercc8   | Mapkapk3     | Slc20a1  |
|                |            | 1700034I23Rik  | Ero1lb  | March3       | Slc22a15 |
|                |            | 1700052K11Rik  | Ezh2    | Marcksl1-ps4 | Slc22a8  |
|                |            | 2210408F21Rik  | Fabp4   | Marveld1     | Slc23a3  |
|                |            | 2310003L22Rik  | Fam164c | Mcm4         | Slc25a14 |
|                |            | 2310057M21Rik  | Fam83b  | Mdm1         | Slc35f1  |
|                |            | 2410004N09Rik  | Fastkd1 | Mest         | Slc38a2  |
|                |            | 2610017I09Rik  | Fermt1  | Mfsd7b       | Slc45a3  |
|                |            | 2610528B01Rik  | Fga     | Mgl2         | Slc7a6   |
|                |            | 2810408B13Rik  | Flrt1   | Mgp          | Slco4a1  |
|                |            | 4930405O22Rik  | Frk     | Mir181a-2    | Smad5    |
|                |            | 4930480K23Rik  | Fsd1l   | Mir188       | Sncg     |
|                |            | 4930522L14Rik  | Fv1     | Mir1927      | Snora15  |
|                |            | 5730409K12Rik  | Fxr2    | Mir1949      | Snora21  |
|                |            | 9130020K20Rik  | Fzd7    | Mir19a       | Snora23  |
|                |            | 9930111J21Rik2 | Gas6    | Mir1b        | Snora2b  |
|                |            | A230072C01Rik  | Gca     | Mir218-1     | Snora69  |
|                |            | A630050E04Rik  | Gcet2   | Mir3473b     | Snora75  |
|                |            | A730098P11Rik  | Glod5   | Mir872       | Snord11  |
|                |            | A930033H14Rik  | Glul    | Mis12        | Snord12  |
|                |            | Abcd2          | Gm10002 | Mmd          | Snord1b  |
|                |            | Abi3           | Gm10589 | Mndal        | Snord35b |
|                |            | Actg1          | Gm13363 | Mpzl3        | Snord52  |
|                |            | Adamts1        | Gm14057 | Mrpl12       | Snord61  |
|                |            | Adat1          | Gm14420 | Msr1         | Snord68  |
|                |            | Adcy4          | Gm15293 | Mthfs        | Snord87  |
|                |            | Adra2b         | Gm15483 | Mtm1         | Snord89  |
|                |            | Akr1c20        | Gm15535 | Mustn1       | Snx32    |
|                |            | Anapc11        | Gm16523 | Nampt        | Snx33    |

|  |               |              |            |          |
|--|---------------|--------------|------------|----------|
|  | Ankra2        | Gm17753      | Ncrna00085 | Sox18    |
|  | Aoc2          | Gm19265      | Neat1      | Sp100    |
|  | Apbb1ip       | Gm19537      | Neurl1b    | Spag5    |
|  | Aqp4          | Gm19551      | Nfkb1      | Srl      |
|  | Arhgap25      | Gm20004      | Nfkb2      | Srsf7    |
|  | Atf7          | Gm20022      | Nicn1      | Stc1     |
|  | Atp5h         | Gm20186      | Nkap       | Susd3    |
|  | Atp8a1        | Gm20289      | Nova1      | Syne1    |
|  | Auts2         | Gm3893       | Nrp1       | Tap2     |
|  | B230319C09Rik | Gm4567       | Ntf3       | Tceb1    |
|  | B230369F24Rik | Gm4759       | Oas1a      | Tek      |
|  | Bbs5          | Gm6289       | Olfm4      | Tle4     |
|  | BC002059      | Gm8842       | Olfr1336   | Tmco4    |
|  | BC027231      | Gm8995       | Olfr776    | Tmem108  |
|  | BC037704      | Gm9958       | Ophn1      | Tmem156  |
|  | BC065397      | Gna14        | Osmr       | Tmem171  |
|  | Bhlhe40       | Gpcpd1       | P2ry14     | Tmem173  |
|  | Birc2         | Gpnmb        | Pag1       | Tmem200b |
|  | C030046E11Rik | Gprc5b       | Paqr3      | Tnip2    |
|  | C630016N16Rik | Hadhb        | Pcdhga11   | Trim30a  |
|  | Cadps2        | Heg1         | Pcgf5      | Trim32   |
|  | Ccl2          | Hells        | Peg13      | Trim6    |
|  | Ccl3          | Hes1         | Per2       | Trip10   |
|  | Ccnd1         | Hist1h4k     | Piga       | Try10    |
|  | Ccnd2         | Hivep2       | Plekhg5    | Tshz3    |
|  | Ccnt1         | Hnf1b        | Plekho1    | Tsku     |
|  | Ccrl2         | Hoxb4        | Plin1      | Tspan1   |
|  | Cd180         | Hoxb5        | Pln        | Tspan4   |
|  | Cd22          | Hoxc9        | Pltp       | Tyms     |
|  | Cd79a         | Hoxd9        | Pon3       | Ugt2b37  |
|  | Cd8b1         | Hyal1        | Ppan       | Ugt2b5   |
|  | Cdc25a        | Icam1        | Ppp2r2a    | Uhrf1bp1 |
|  | Cdk17         | Ilf12711     | Pprc1      | Unc13c   |
|  | Ceacam14      | Ikzf2        | Praf2      | Usp31    |
|  | Cebpa         | Itga3        | Prdm9      | Usp40    |
|  | Cep170        | Itga5        | Prim1      | Vcam1    |
|  | Chml          | Itgax        | Ptch1      | Vmn1r71  |
|  | Chst1         | Jun          | Ptgs1      | Wdr36    |
|  | Chst2         | Kcnj2        | Ptp4a1     | Wdr76    |
|  | Clec14a       | Kcnk1        | Ptpla      | Wwc1     |
|  | Clec2d        | Kcnq1        | Purg       | Xdh      |
|  | Cox7b         | Kctd12b      | Pvrl1      | Zbtb2    |
|  | Cpeb1         | Klhdc7a      | Rab6b      | Zbtb38   |
|  | Crip1         | Klhdc8a      | Rab8b      | Zdhhc2   |
|  | Crip2         | Klkb1        | Rad1       | Zdhhc20  |
|  | Cwh43         | Lad1         | Rad9b      | Zfp128   |
|  | Cxcl10        | Larp4b       | Rapgef3    | Zfp229   |
|  | D5Ertd579e    | Layn         | Rasa3      | Zfp429   |
|  | D730048I06Rik | Lep          | Rasl11b    | Zfp451   |
|  | D930015E06Rik | LOC100503141 | Rel        | Zfp503   |
|  | Dcaf12        | LOC100505027 | Rfc4       | Zfp566   |
|  | Derl3         | LOC100861803 | Rnu73b     | Zfp597   |
|  | Dhrs3         | LOC100861921 | Rny1       | Zfp605   |



|  |  |               |              |          |        |
|--|--|---------------|--------------|----------|--------|
|  |  | Disp1         | LOC100862007 | Rps17    | Zfp667 |
|  |  | Dnalc1        | LOC545261    | Rsl1     | Zfp788 |
|  |  | Dnase1l3      | LOC628147    | Rtkn     | Zfp879 |
|  |  | Dpy19l1       | Lpcat1       | Scarna3b | Zranb3 |
|  |  | Dsg2          | Lrig1        | Scn4b    | Zscan2 |
|  |  | Dusp11        | Mafb         | Scube3   | Zxdb   |
|  |  | E330009J07Rik | Magohb       | Shmt1    |        |
