# Supplementary material for: Loss of Renal Tubular PGC-1α Exacerbates Diet-Induced Renal Steatosis and Age-Related Urinary Sodium Excretion in Mice
Source: PubMed Central journal article supplement (PMC4963111; doi:10.1371/journal.pone.0158716), 2016-07-27
Supplement: pone.0158716.s010.pdf [file pone.0158716.s010.pdf]

S4 Table

| Chow - CTRL vs. NiPKO – Down-regulated genes |                           |          |                  |              |                                                                                                                                                                                                                                                                                      |
|----------------------------------------------|---------------------------|----------|------------------|--------------|--------------------------------------------------------------------------------------------------------------------------------------------------------------------------------------------------------------------------------------------------------------------------------------|
| #term                                        | Term name                 | p-value  | Adjusted p-value | -log(p)      | Positive ids                                                                                                                                                                                                                                                                         |
| mmu05012                                     | Parkinson's disease (PD)  | 8.75E-36 | 1.65E-33         | <b>32.78</b> | Cox7a1,ND6,LOC100046079,Atp5h,Atp5e,Uqcrfs1,Cycs,Ndufc1,Atp5g3,Cox5a,Ndufs1,Cox4i1,Uqcrh,Ndufa8,Ndufa4,Uqcrc1,Cyc1,Ndufv2,BC002163,Ndufs6,Sdhd,Cox7a2,Ndufa1,Ndufb8,Ndufa9,Uqcrb,Ndufs8,Cox7b,Uqcrq,Atp5d,Vdac2,Slc25a4,Ndufa6,Ndufs3,Atp5f1,Vdac3,Ndufb2,Sdhc,Ndufb5,Sdha,Ndufs2    |
| mmu00190                                     | Oxidative phosphorylation | 2.39E-35 | 2.26E-33         | <b>32.65</b> | Cox7a1,Cox10,ND6,LOC100046079,Atp5h,Atp5e,Uqcrfs1,Ndufc1,Atp5g3,Cox5a,Ndufs1,Cox4i1,Uqcrh,Ndufa8,Ndufa4,Atp5l,Uqcrc1,Cyc1,Atp4a,Ndufv2,BC002163,Ndufs6,Sdhd,Cox7a2,Ndufa1,Ndufb8,Ndufa9,Uqcrb,Ndufs8,Cox7b,Uqcrq,Atp5d,Ndufa6,Ndufs3,Atp5f1,Ndufb2,Sdhc,Ndufb5,Sdha,Ndufs2           |
| mmu05016                                     | Huntington disease (HD)   | 4.71E-31 | 2.97E-29         | <b>28.53</b> | Cox7a1,LOC100046079,Atp5h,Atp5e,Uqcrfs1,Cycs,Ndufc1,Atp5g3,Cox5a,Ndufs1,Cox4i1,Uqcrh,Ndufa8,Ndufa4,Uqcrc1,Cyc1,Ndufv2,BC002163,Ndufs6,Sdhd,Cox7a2,Ndufa1,Ndufb8,Ndufa9,Uqcrb,Ndufs8,Cox7b,Uqcrq,Atp5d,Vdac2,Slc25a4,Ndufa6,Ndufs3,Atp5f1,Vdac3,Ndufb2,Sdhc,Polr2h,Ndufb5,Sdha,Ndufs2 |
| mmu05010                                     | Alzheimer's disease (AD)  | 2.11E-26 | 9.97E-25         | <b>24.00</b> | Cox7a1,LOC100046079,Atp5h,Atp5e,Uqcrfs1,Cycs,Ndufc1,Atp5g3,Cox5a,Ndufs1,Cox4i1,Uqcrh,Ndufa8,Ndufa4,Uqcrc1,Cyc1,Ndufv2,BC002163,Ndufs6,Sdhd,Cox7a2,Ndufa1,Ndufb8,Ndufa9,Uqcrb,Ndufs8,Cox7b,Uqcrq,Atp5d,Ndufa6,Ndufs3,Atp5f1,Ndufb2,Sdhc,Ndufb5,Sdha,Ndufs2                            |
| mmu00020                                     | The citrate cycle         | 9.63E-15 | 3.64E-13         | <b>12.44</b> | ldh3a,Pdha1,Dlst,Dlat,Sdhd                                                                                                                                                                                                                                                           |

|          |                                             |          |          |             |                                                                                    |
|----------|---------------------------------------------|----------|----------|-------------|------------------------------------------------------------------------------------|
|          | (TCA cycle, Krebs cycle)                    |          |          |             | ,Pdhb,Cs,Fh1,Mdh2,Dld,Sdhc,Sdha,ldh3b                                              |
| mmu04260 | Cardiac muscle contraction                  | 6.99E-08 | 2.2E-06  | <b>5.66</b> | Cox7a1,LOC100046079,Uqcrfs1,Cox5a,Cox4i1,Uqcrh,Uqcr1,Cyc1,Cox7a2,Uqcrb,Cox7b,Uqcrq |
| mmu00010 | Glycolysis                                  | 8.17E-08 | 2.21E-06 | <b>5.66</b> | Pfkm,Pfkp,Pgam1,Ldhb,Pdha1,Pgam2,Dlat,Pgk1,Hk1,Pdhhb,Dld                           |
| mmu00620 | Pyruvate metabolism                         | 1.50E-05 | 0.000354 | <b>3.45</b> | Me3,Ldhb,Pdha1,Dlat,Pdhhb,Mdh2,Dld                                                 |
| mmu00250 | Alanine, aspartate and glutamate metabolism | 3.02E-04 | 0.006348 | <b>2.20</b> | Got1,Gpt2,Adssl1,Glul,Ddo                                                          |

### Chow - CTRL vs. NiPKO – Up-regulated genes

| #term    | Term name                | p-value    | Adjusted p-value | -log(p) | Positive ids                     |
|----------|--------------------------|------------|------------------|---------|----------------------------------|
| mmu00511 | Other glycan degradation | 0.00002377 | 0.004493         | 2.35    | Hexa, Sox10, Foxi1, Neu4, Man2b2 |

### HFD - CTRL vs. NiPKO – Down-regulated genes

| #term    | Term name                 | p-value  | Adjusted p-value | -log(p)      | Positive ids                                                                                                                                                                           |
|----------|---------------------------|----------|------------------|--------------|----------------------------------------------------------------------------------------------------------------------------------------------------------------------------------------|
| mmu00190 | Oxidative phosphorylation | 2.19E-20 | 4.1363E-18       | <b>17.38</b> | Ndufa9,Cox7a1,Atp5h,Uqcr1,Cox5a,Cox7a2,Ndufa4,Ndufs3,Ndufs8,Uqcrfs1,Atp5g3,Ndufa8,Cyc1,Uqcrh,Atp5k,Ndufc1,Cox10,Atp5f1,Uqcrq,LOC100046079,Atp5c1,Atp5e,Atp5g1,Ndufa1,Cox5b,Uqcrb       |
| mmu05012 | Parkinson's disease (PD)  | 7.45E-20 | 7.04477E-18      | <b>17.15</b> | Ndufa9,Cox7a1,Atp5h,Uqcr1,Cox5a,Cox7a2,Ndufa4,Ndufs3,Ndufs8,Uqcrfs1,Atp5g3,Ndufa8,Cyc1,Uqcrh,Ndufc1,Atp5f1,Uqcrq,LOC100046079,Atp5c1,Atp5e,Cygs,Slc25a4,Atp5g1,Ndufa1,Cox5b,Uqcrb      |
| mmu05010 | Alzheimer's disease (AD)  | 3.26E-18 | 1.80054E-16      | <b>15.74</b> | Ndufa9,Cox7a1,Atp5h,Uqcr1,Cox5a,Cox7a2,Ndufa4,Ndufs3,Ndufs8,Uqcrfs1,Atp5g3,Ndufa8,Cyc1,Uqcrh,Ndufc1,Atp5f1,Uqcrq,LOC100046079,Atp5c1,Atp5e,Cygs,Atp5g1,Ndufa1,Atp2a1,Cox5b,Gapdh,Uqcrb |

|          |                               |          |             |              |                                                                                                                                                                                                   |
|----------|-------------------------------|----------|-------------|--------------|---------------------------------------------------------------------------------------------------------------------------------------------------------------------------------------------------|
| mmu05016 | Huntington disease (HD)       | 3.81E-18 | 1.80054E-16 | <b>15.74</b> | Ndufa9,Cox7a1,Atp5h,Uqcr c1,Cox5a,Cox7a2,Ndufa4,N dufs3,Ndufs8,Uqcrfs1,Atp5 g3,Ndufa8,Cyc1,Uqcrh,Ndu fc1,Atp5f1,Uqcrq,LOC1000 46079,Atp5c1,Atp5e,Cyca,S lc25a4,Atp5g1,Ndufa1,Cox5 b,Uqcrb,Creb3l3 |
| mmu04260 | Cardiac muscle contraction    | 7.95E-08 | 3.00472E-06 | <b>5.52</b>  | Cox7a1,Uqcr c1,Cox5a,Cox7 a2,Uqcrfs1,Cyc1,Uqcrh,Uq crq,LOC100046079,Cox5b,U qcrb                                                                                                                  |
| mmu00010 | Glycolysis                    | 1.16E-06 | 3.65533E-05 | <b>4.44</b>  | Tpi1,Ldhd,Pfkf,Dlat,Pgk1,G 6pc,Pgam1,Pfkf,Gapdh                                                                                                                                                   |
| mmu00020 | The citrate cycle             | 1.39E-04 | 0.00375555  | <b>2.43</b>  | Mdh2,Idh3a,Dlat,Fh1,Dlat                                                                                                                                                                          |
| mmu00071 | Fatty acid degradation        | 8.26E-04 | 0.0195103   | <b>1.71</b>  | Acaa2,Acsl3,Acadl,Acadvl,H adha                                                                                                                                                                   |
| mmu00030 | The pentose phosphate pathway | 1.21E-03 | 0.0254251   | <b>1.59</b>  | Pfkf,Pgls,Pfkf,G6pd2                                                                                                                                                                              |

| <b>HFD - CTRL vs. NiPKO – Up-regulated genes</b> |                                          |          |                  |             |                                                                                 |
|--------------------------------------------------|------------------------------------------|----------|------------------|-------------|---------------------------------------------------------------------------------|
| #term                                            | Term name                                | p-value  | Adjusted p-value | -log(p)     | Positive ids                                                                    |
| mmu05322                                         | Systemic lupus erythematosus (SLE)       | 1.89E-05 | 0.00356441       | <b>2.45</b> | C2,Hist1h2bn,Hist2h3b,Act n1,Hist2h3c2,Hist2h2be,C8 a,Hist1h4i,C9,H2-DMb2,H2afj |
| mmu00260                                         | Glycine, serine and threonine metabolism | 2.10E-04 | 0.0198883        | <b>1.70</b> | Gamt,Psat1,Cbs,Maoa,Mao b                                                       |
| mmu00531                                         | Glycosaminoglycan degradation            | 5.79E-04 | 0.036507         | <b>1.44</b> | Hexb,Hexa,Hpse2,Galns                                                           |
